# Supplementary material
Source: PubMed Central journal article supplement (PMC10073240)
Supplement: NIHMS1852247-supplement-2.pdf [file NIHMS1852247-supplement-2.pdf]

## Supplementary figure 2

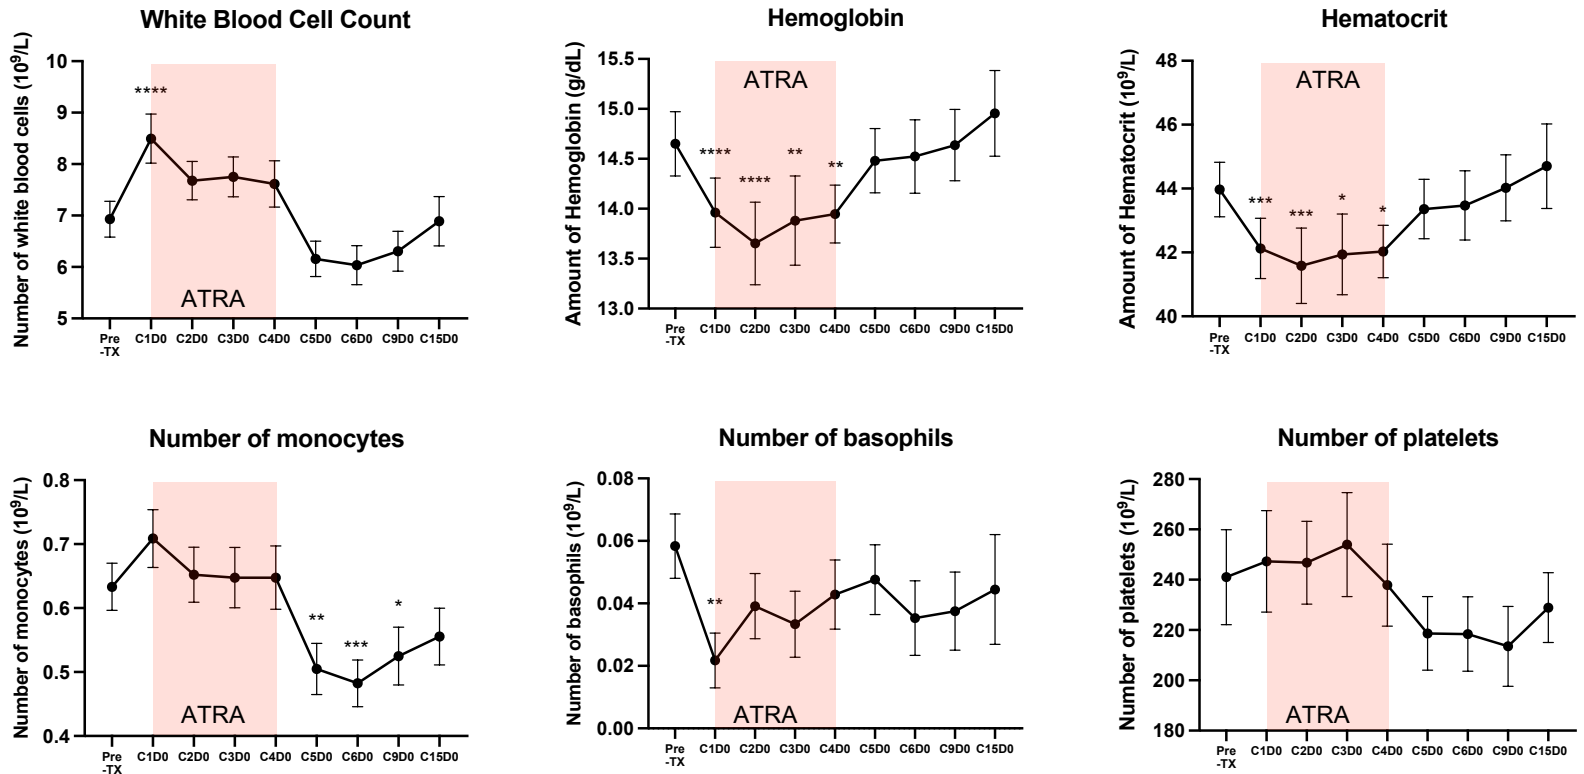

**Supplementary figure 2.** Changes in other clinical hematologic measures. Colored box denotes the time when the patients were being treated with ATRA. \* Denotes  $p < 0.05$ , \*\*  $p < 0.01$ , \*\*\*  $p < 0.001$ , \*\*\*\*  $p < 0.0001$ .
